# Supplementary material
Source: PubMed Central journal article supplement (PMC1584373)
Supplement: bmj_38924.722037.7C_1.pdf [file bmj_38924.722037.7C_1.pdf]

- w1. Mangus RS, Hawkins CE, Miller MJ. Prevalence of harassment and discrimination among 1996 medical school graduates: a survey of eight US schools. *JAMA* 1998;280:851-3.
- w2. Baldwin DC, Daugherty SR, Eckenfels EJ. Student perceptions of mistreatment and harassment during medical school: a survey of ten United States schools. *West J Med* 1991;155:140-5.
- w3. Silver HK, Glick AD. Medical student abuse. Incidence, severity, and significance. *JAMA* 1990;263:527-32.
- w4. Schuchert MK. The relationship between verbal abuse of medical students and their confidence in their clinical abilities. *Acad Med* 1998;73:907-9.
- w5. Elnicki DM, Curry RH, Ragan M, Friedman E, Jacobson E, Loftus T, et al. Medical students' perspectives on and responses to abuse during the internal medicine clerkship. *Teach Learn Med* 2002;14:92-7.
- w6. Lempp H, Seale C. The hidden curriculum in undergraduate medical education: qualitative study of medical students' perceptions of teaching. *BMJ* 2004;329:770-3.
- w7. Kassebaum DG, Cutler ER. On the culture of student abuse in medical school. *Acad Med* 1998;73:1149-58.
- w8. Nora LM, McLaughlin MA, Fosson SE, Jacob SK, Schmidt JL, Witzke DB. Gender discrimination and sexual harassment in medical education: perspectives gained by 14-school study. *Acad Med* 2002;77(12 Pt 1):1226-34.
- w9. Lillemore KD, Ahrendt GM, Yeo CJ, Herlong HF, Cameron JL. Surgery—still an 'old boys club'? *Surgery* 1994;116:255-9.
- w10. Dresler CM, Padgett DL, Mackinnon SE, Patterson GA. Experiences of women in cardiothoracic surgery: a gender comparison. *Arch Surg* 1996;131:1128-34.
- w11. Geisler JP, Mernitz CS, Geilser MJ, Harsha CG, Eskew PR. Does gender discrimination exist in a gynecology training program in a private hospital? *Clin Exp Obstet Gynecol* 1999;26:53-5.
- w12. Nora LM, McLaughlin MA, Fosson SE, Jacob SK, Schmidt JL, Witzke DB. Does exposure to gender discrimination and sexual harassment impact medical students' specialty choices and residency program selections? *Acad Med* 1996;71(10 suppl):S22-4.
- w13. Grant L. The gender climate of medical school: perspectives of women and men students. *J Am Med Assoc* 1988;43:109-10, 115-9.
- w14. Richardson DA, Becker M, Frank RR, Sokol RJ. Assessing medical students' perceptions of mistreatment in their second and third years. *Acad Med* 1997;72:728-30.
- w15. Frank E, Brogan DJ, Schiffman M. Prevalence and correlates of harassment among US women physicians. *Arch Intern Med* 1998;158:352-8.
- w16. Komaromy M, Bindman AB, Haber RJ, Sande MA. Sexual harassment in medical training. *N Engl J Med* 1993;328:322-6.
- w17. Larsson C, Hensing G, Allebeck P. Sexual and gender-related harassment in medical education and research training: results from a Swedish survey. *Med Educ* 2003;37:39-50.
- w18. White GE. Sexual harassment during medical training: the perceptions of medical students at the university medical school in Australia. *Med Educ* 2000;34:980-6.
- w19. Moscarello R, Margittai KJ, Rossi M. Differences in abuse reported by female and male Canadian medical students. *CMAJ* 1994;150:357-63.
- w20. Baldwin DC, Daugherty SR. Distinguishing sexual harassment from discrimination: a factor-analytic study of residents' reports. *Acad Med* 2001;76(suppl):S5-7.

w21. Sheehan KH, Sheehan DV, White K, Leibowitz A, Baldwin DC. A pilot study of medical student 'abuse'. Student perceptions of mistreatment and misconduct in medical school. *JAMA* 1990;263:533-7.
